# Supplementary material for: Development of a Simple Clinical Score to Predict Early Neurological Improvement after Mechanical Thrombectomy: A Single-Centre Cohort Study
Source: Research Square preprint supplement (doi:10.21203/rs.3.rs-8536054/v1), 2026-02-02
Supplement: Supplementary file 1 [file c79622273e50e0a2be2c8304.docx]

Table S1. Sensitivity analyses of the multivariable model for early neurological improvement

| **Predictor** | **Model 1 All patients (standard ENI)* Adjusted OR (95% CI)** | **Model 1 p-value** | **Model 2 Anterior circulation only Adjusted OR (95% CI)** | **Model 2 p-value** | **Model 3 ENI defined as NIHSS decrease ≥8 only Adjusted OR (95% CI)** | **Model 3 p-value** |
| --- | --- | --- | --- | --- | --- | --- |
| **NIHSS_baseline (per 1-point increase)** | 1.13 (1.05–1.21) | <0.001 | 1.17 (1.07–1.28) | <0.001 | 1.23 (1.14–1.34) | <0.001 |
| **Diabetes** | 1.41 (0.56–3.54) | 0.468 | 1.55 (0.47–5.08) | 0.467 | 2.00 (0.72–5.53) | 0.181 |
| **Cardioembolic disease** | 1.23 (0.61–2.48) | 0.558 | 1.25 (0.55–2.85) | 0.594 | 1.32 (0.61–2.86) | 0.480 |
| **DPT >12 h** | 0.45 (0.12–1.66) | 0.229 | 0.75 (0.19–2.90) | 0.674 | 0.35 (0.07–1.70) | 0.193 |

*Standard ENI definition: NIHSS decrease ≥8 points or NIHSS ≤1 at 1 week.
